# Supplementary material for: Tanshinone IIA Facilitates Efficient Cartilage Regeneration under Inflammatory Factors Caused Stress via Upregulating LncRNA NEAT1_2
Source: MDPI journal article supplement (doi:10.3390/biomedicines11123291), 2023-12-12
Supplement: s1 [file s1]

# Tanshinone IIA Facilitates Efficient Cartilage Regeneration under Inflammatory Factors Caused Stress via Upregulating LncRNA NEAT1\_2

Jingjing Sun <sup>1,†</sup>, Wei Chen <sup>2,†</sup>, Zheng Zhou <sup>1,\*</sup>, Xin Chen <sup>2</sup>, You Zuo <sup>1</sup>, Jiaqian He <sup>1</sup> and Hairong Liu <sup>2,\*</sup>

<sup>1</sup> College of Biology, Hunan University, Changsha 410082, China; jingjingsun@hnu.edu.cn (J.S.); you-zuo@hotmail.com (Y.Z.); hejiaqian@hnu.edu.cn (J.H.)

<sup>2</sup> College of Material Science and Engineering, Hunan University, Changsha 410082, China; chenwei690@hnu.edu.cn (W.C.); chenxin\_hnu@hnu.edu.cn (X.C.)

\* Correspondence: zhouzheng@hnu.edu.cn (Z.Z.); liuhairong@hnu.edu.cn (H.L.)

<sup>†</sup> These authors contributed equally to this work.

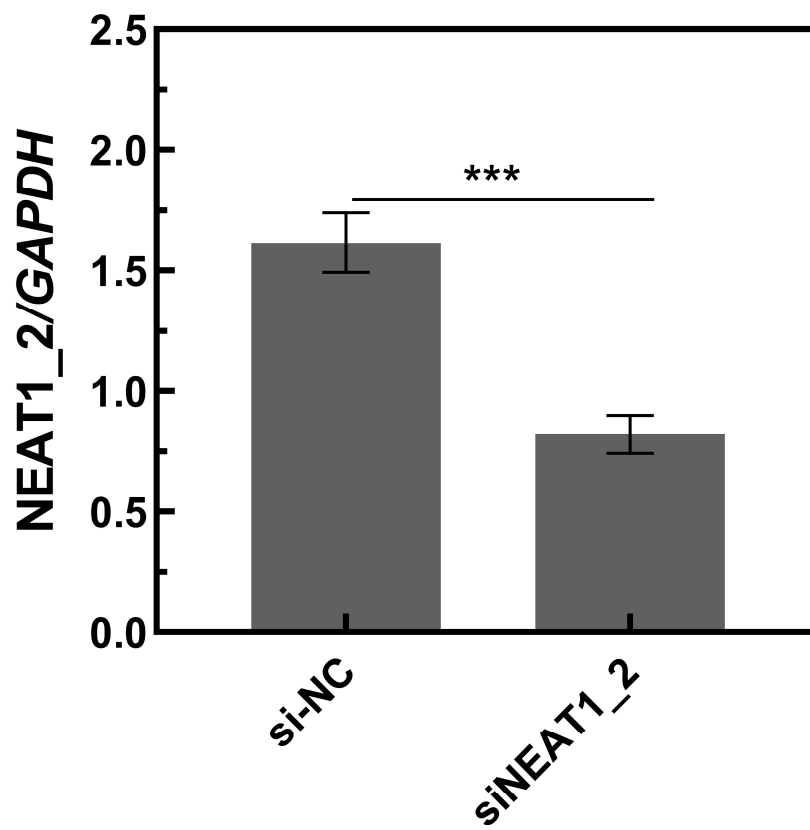

**Figure S1.** The efficiency of siRNA interfering with NEAT1\_2 in SW1353 indicated.

\* $P < 0.05$ , \*\* $P < 0.01$ , \*\*\* $P < 0.001$ , by two-tailed Student's  $t$  test.

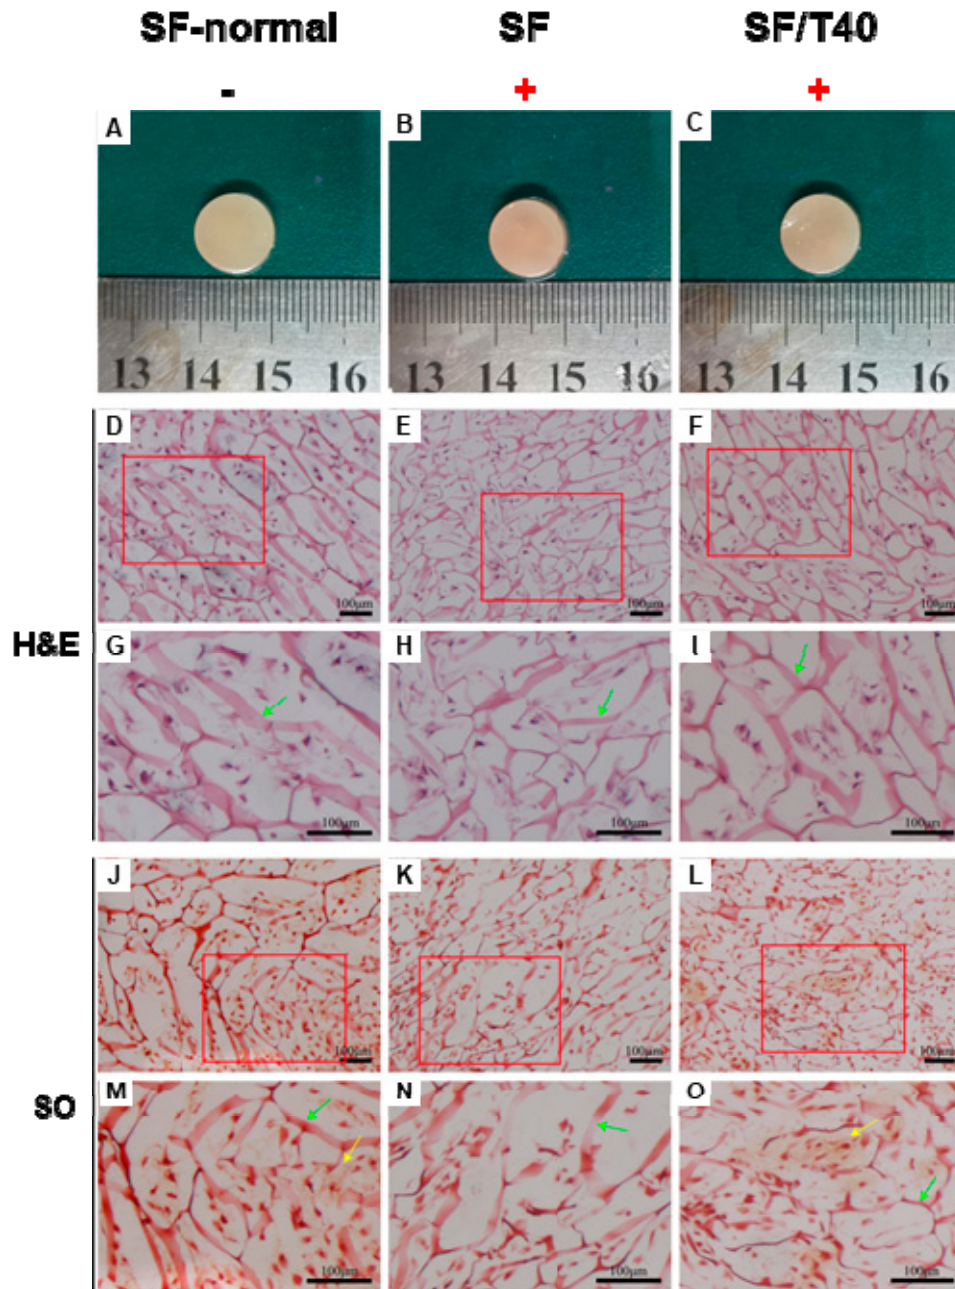

**Figure S2.** TAN promotes cartilage regeneration in vitro. Gross morphology (A-C), H&E staining(D-I) and SO staining (J-O) of samples(n=3) after 2 weeks of in vitro culture following IL-1 $\beta$  and TNF- $\alpha$  stimuli for 1 week. ('+' indicates addition of IL-1 $\beta$  + TNF- $\alpha$  to the culture environment. Green arrows indicate scaffolds. The red box is the corresponding zoom area.) ('+' indicates addition of IL-1 $\beta$  + TNF- $\alpha$  to the culture environment. Green arrows indicate scaffolds. The red box is the corresponding zoom area.).

| Samples<br>Day | SF/T5   | SF/T10   | SF/T20   | SF/T40   |
|----------------|---------|----------|----------|----------|
| 1              | 0.24946 | 0.32334  | 0.32877  | 0.32551  |
| 3              | 1.99131 | 2.4259   | 2.25554  | 2.89526  |
| 5              | 4.57975 | 5.68796  | 5.8618   | 6.75272  |
| 7              | 6.35443 | 7.80052  | 9.11584  | 10.47347 |
| 14             | 8.602   | 11.61147 | 13.74489 | 18.47849 |
| 21             | 8.40417 | 11.92438 | 14.96654 | 21.87658 |
| 28             | 9.09952 | 12.41113 | 15.79226 | 23.11517 |
| 35             | 9.34289 | 12.38288 | 16.57453 | 23.85398 |

**Table S1.** Cumulative release of TAN over time, in mg/L.
